# Supplementary material for: Large monolithic silica-based macrocellular foams with trimodal pore system
Source: Royal Society of Chemistry journal article supplement (doi:10.1039/b301620j), 2003-01-01
Supplement: b301620j.doc [file b301620j.doc]

# Supplementary data

**Large monolithic silica-based macrocellular foams with trimodal pore system**

Lenin Huerta,‡ Carmen Guillem, Julio Latorre, Aurelio Beltrán, Daniel Beltrán and Pedro Amorós*

Institut de Ciència dels Materials (ICMUV), Universitat de València, P. O. Box 2085, 46071-València, Spain.

Fax: 34 96 3543633; Tel: 34 96 3543617; E-mail: [pedro.amoros@uv.es](mailto:pedro.amoros@uv.es)

*‡ Departamento de Química, Facultad de Ciencias, Universidad del Zulia, P. O. Box 526, Maracaibo, Venezuela.*

***
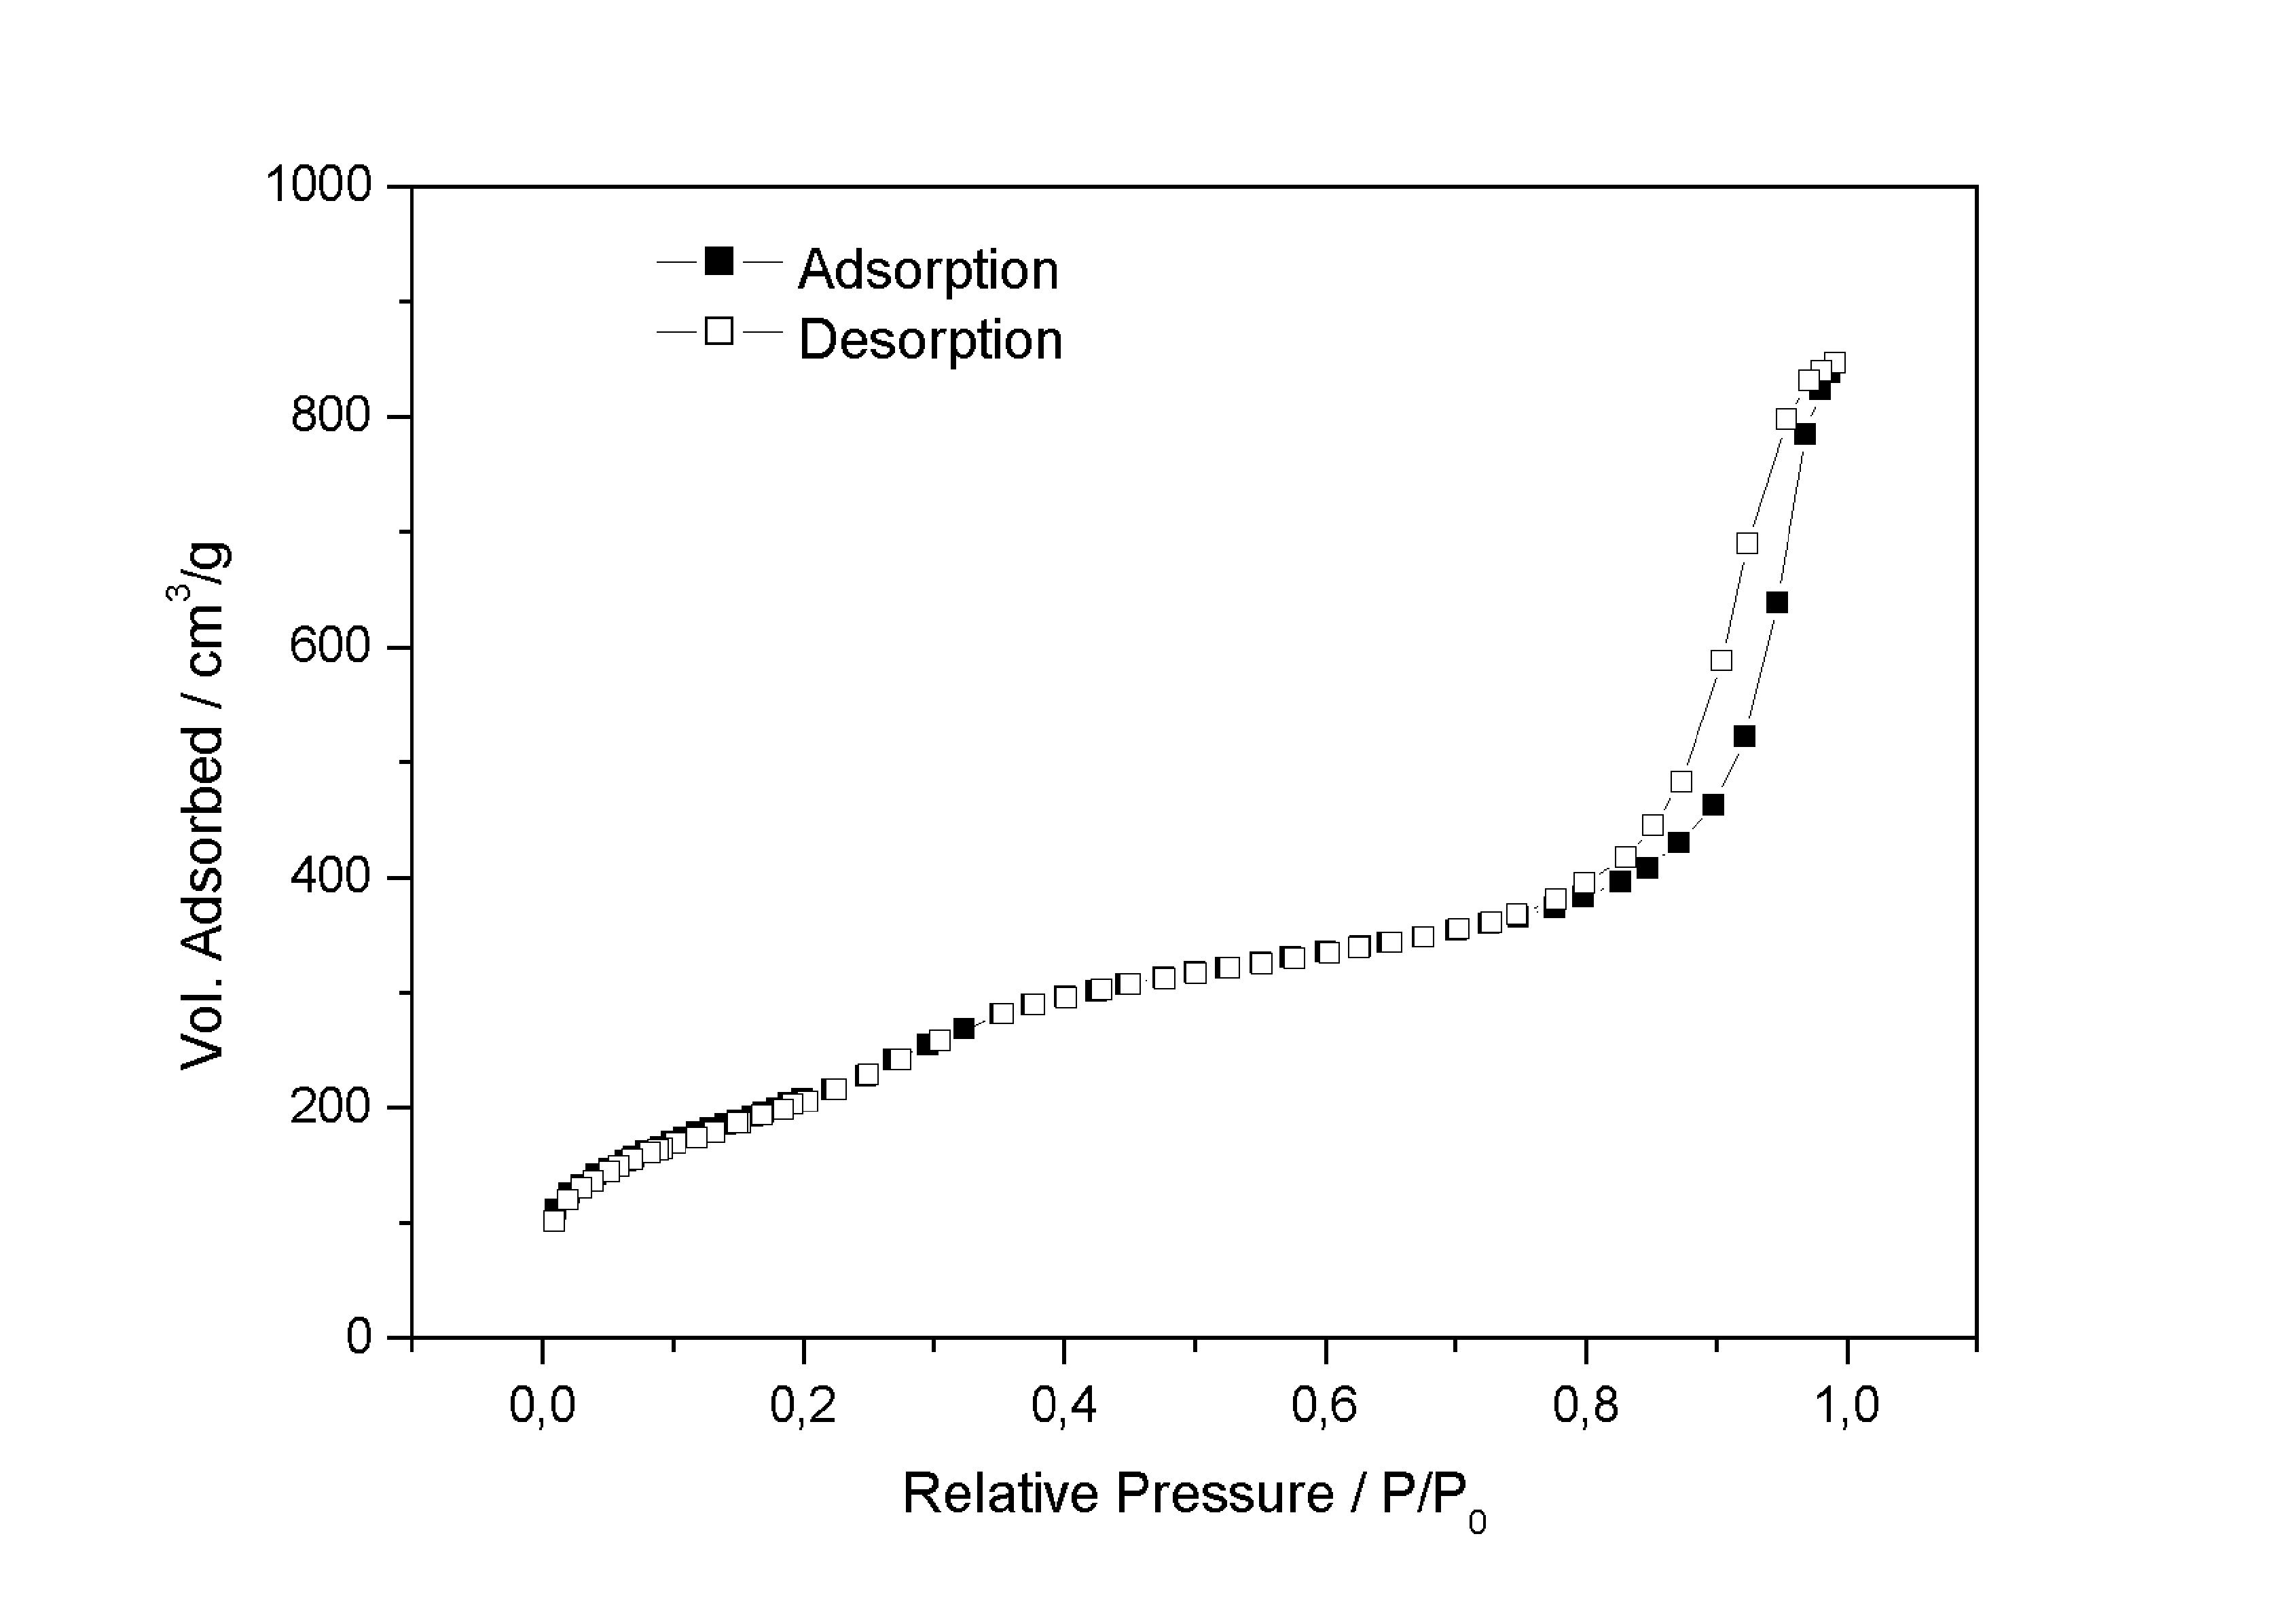
***

**Fig. S1** N2 adsorption-desorption isotherm of a trimodal porous silica monolith.
